# Supplementary material for: Uncovering the Use of Fucoxanthin and Phycobiliproteins into Solid Matrices to Increase Their Emission Quantum Yield and Photostability
Source: MDPI journal article supplement (doi:10.3390/app12125839), 2022-06-08
Supplement: s1 [file s1]

## Supplementary Information

# Uncovering the Use of Fucoxanthin and Phycobiliproteins into Solid Matrices to Increase Their Emission Quantum Yield and Photostability

Lília M. S. Dias <sup>1</sup>, Gabriela Kovalski <sup>1,2</sup>, Lianshe Fu <sup>1,\*</sup>, Tânia R. Dias <sup>3</sup>, Inês P. E. Macário <sup>2,3</sup>, Sandra F. H. Correia <sup>4</sup>, Joana L. Pereira <sup>3</sup>, João A. P. Coutinho <sup>2</sup>, Sónia P. M. Ventura <sup>2</sup> and Rute A. S. Ferreira <sup>1,\*</sup>

<sup>1</sup> Department of Physics and CICECO—Aveiro Institute of Materials, University of Aveiro, 3810-193 Aveiro, Portugal; liliadias@ua.pt (L.M.S.D.); gabrielak@ua.pt (G.K.)

<sup>2</sup> Department of Chemistry and CICECO—Aveiro Institute of Materials, University of Aveiro, 3810-193 Aveiro, Portugal; inese@ua.pt (I.P.E.M.); jcoutinho@ua.pt (J.A.P.C.); spventura@ua.pt (S.P.M.V.)

<sup>3</sup> Department of Biology and CESAM—Centre for Environmental and Marine Studies, University of Aveiro, 3810-193 Aveiro, Portugal; dias.t@ua.pt (T.R.D.); jpereira@ua.pt (J.L.P.)

<sup>4</sup> Instituto de Telecomunicações And University of Aveiro, Campus Universitário de Santiago, 3810-193 Aveiro, Portugal; sandracorreia@ua.pt

\* Correspondence: lianshefu@ua.pt (L.F.); rferreira@ua.pt (R.A.S.F.)

## Contents

**Table S1.** Absolute emission quantum yield ( $\eta$ ) values of the as-prepared samples for the indicated excitation wavelengths ( $\lambda_{exc}$ , nm).

**Table S2.** Absolute emission quantum yield ( $\eta$ ) values of the samples after continuous exposition to AM1.5G radiation ( $t$ ) for the indicated excitation wavelengths ( $\lambda_{exc}$ , nm).

**Figure S1.** Calibration curves were used the determination the concentration of each one of the extracts studied: (a) FX in ethanol, (b) R-PE in H<sub>2</sub>O, and (c) C-PC in H<sub>2</sub>O.

**Figure S2.** Room-temperature (a) excitation and (b) emission spectra of R-PE in H<sub>2</sub>O.

**Figure S3.** Room-temperature (a) excitation and (b) emission spectra of R-PE/PVA sample.

**Figure S4.** Room-temperature (a) excitation and (b) emission spectra of R-PE/alginate.

**Figure S5.** Room-temperature (a) excitation and (b) emission spectra of C-PC in H<sub>2</sub>O.

**Figure S6.** Room-temperature (a) excitation and (b) emission spectra of C-PC/PVA.

**Figure S7.** Room-temperature (a) excitation and (b) emission spectra of FX in ethanol.

**Figure S8.** Room-temperature (a) excitation and (b) emission spectra of FX/PVA.

**Figure S9.** Room-temperature emission decay curve of (a) R-PE in H<sub>2</sub>O, (b) R-PE/PVA and (c) R-PE/alginate excited at 388 nm and monitored at 580 nm. The solid lines represent the data best fit ( $R^2 > 0.99$ ), using a single-exponential function  $I(t) = I_1 e^{-(t-t_0)/\tau_1}$  ( $t_0 = 13$  ns, related to the excitation prompt). The respective residual plot is presented in (d).

**Figure S10.** Room-temperature emission decay curve of (a) C-PC in H<sub>2</sub>O and (b) C-PC/PVA excited at 388 nm and monitored at 670 nm. The solid lines represent the data best fit ( $R^2 > 0.97$ ), using a single-exponential function  $I(t) = I_1 e^{-(t-t_0)/\tau_1}$  ( $t_0 = 13$  ns, related to the excitation prompt). The respective residual plots are presented in (c).

**Figure S11.** Room-temperature emission decay curve of (a) FX in ethanol and (b) FX/PVA excited at 388 nm and monitored at 675 nm. The solid lines represent the data best fit ( $R^2 > 0.99$ ), using a single-exponential

function  $I(t) = I_1 e^{-(t-t_0)/\tau_1}$  ( $t_0 = 20$  ns, related to the excitation prompt). The respective residual plot is presented in (c).

**Table S1.** Absolute emission quantum yield ( $\eta$ ) values of the as-prepared samples for the indicated excitation wavelengths ( $\lambda_{exc}$ , nm) and emission lifetime values ( $\tau$ ), are calculated from the best fit of the decay curves shown in Figures S9–S11.

shown in Figures S9–S11.

| Sample                   | $\lambda_{\text{exc}}$ (nm) | $H$   | $\tau$ (ns) |
|--------------------------|-----------------------------|-------|-------------|
| R-PE in H <sub>2</sub> O | 380                         | 0.09  | 3.30 ± 0.01 |
|                          | 488                         | 0.17  |             |
|                          | 590                         | 0.18  |             |
| R-PE/alginate            | 330                         | <0.01 | 5.59 ± 0.04 |
|                          | 360                         |       |             |
|                          | 375                         |       |             |
|                          | 405                         | 0.02  |             |
|                          | 498                         |       |             |
|                          | 565                         |       |             |
| R-PE/PVA                 | 330                         | 0.04  | 3.74 ± 0.03 |
|                          | 360                         |       |             |
|                          | 375                         |       |             |
|                          | 498                         | 0.11  |             |
|                          | 535                         | 0.10  |             |
|                          | 565                         | 0.11  |             |
|                          | 625                         | 0.12  |             |
| C-PC in H <sub>2</sub> O | 370                         | 0.09  | 3.09 ± 0.03 |
|                          | 410                         | 0.08  |             |
|                          | 550                         | 0.17  |             |
|                          | 590                         | 0.20  |             |
|                          | 660                         | 0.18  |             |
| C-PC/PVA                 | 275                         | 0.01  | 4.30 ± 0.04 |
|                          | 310                         | 0.02  |             |
|                          | 360                         | 0.04  |             |
|                          | 370                         | 0.05  |             |
|                          | 400                         | 0.07  |             |
|                          | 580                         | 0.09  |             |
|                          | 630                         | 0.10  |             |
| FX in ethanol            | 350                         | 0.03  | 6.96 ± 0.01 |
|                          | 390                         | 0.04  |             |
|                          | 410                         |       |             |
|                          | 510                         | 0.03  |             |
|                          | 540                         | 0.05  |             |
|                          | 610                         | 0.08  |             |
|                          | 665                         | 0.07  |             |
| FX/PVA                   | 270                         | <0.01 | 6.68 ± 0.02 |
|                          | 360                         | 0.05  |             |
|                          | 405                         | 0.07  |             |
|                          | 505                         | 0.03  |             |
|                          | 535                         | 0.04  |             |
|                          | 560                         | 0.06  |             |
|                          | 610                         | 0.10  |             |
|                          | 665                         | 0.09  |             |

**Table S2.** Absolute emission quantum yield ( $\eta$ ) values of the samples after continuous exposition to AM1.5G radiation ( $t$ ) for the indicated excitation wavelengths ( $\lambda_{\text{exc}}$ , nm).

| Sample   | $\lambda_{\text{exc}}$ (nm) | $\eta$ ( $\pm 0.01$ ) |               |               |               |
|----------|-----------------------------|-----------------------|---------------|---------------|---------------|
|          |                             | t=0                   | t=120 minutes | t=540 minutes | t=960 minutes |
| R-PE/PVA | 498                         | 0.10                  | 0.05          | 0.04          | 0.04          |
| C-PC/PVA | 580                         | 0.08                  | 0.04          | 0.03          | <0.01         |
| FX/PVA   | 610                         | 0.12                  | 0.10          | 0.09          | 0.08          |

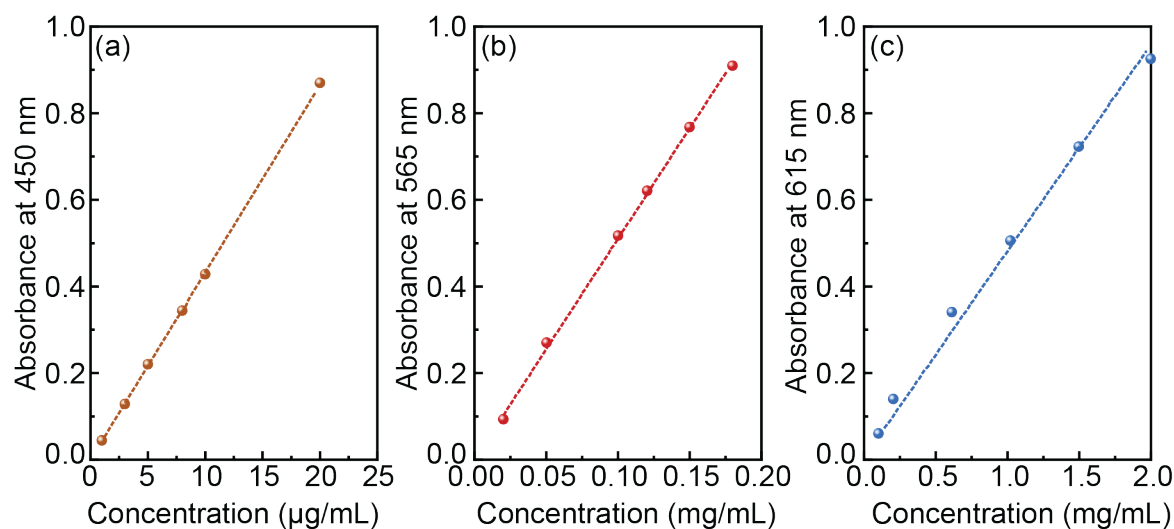**Figure S1.** Calibration curves were used to the determination of the concentration of each one of the extracts studied: (a) FX in ethanol, (b) R-PE in H<sub>2</sub>O, and (c) C-PC in H<sub>2</sub>O.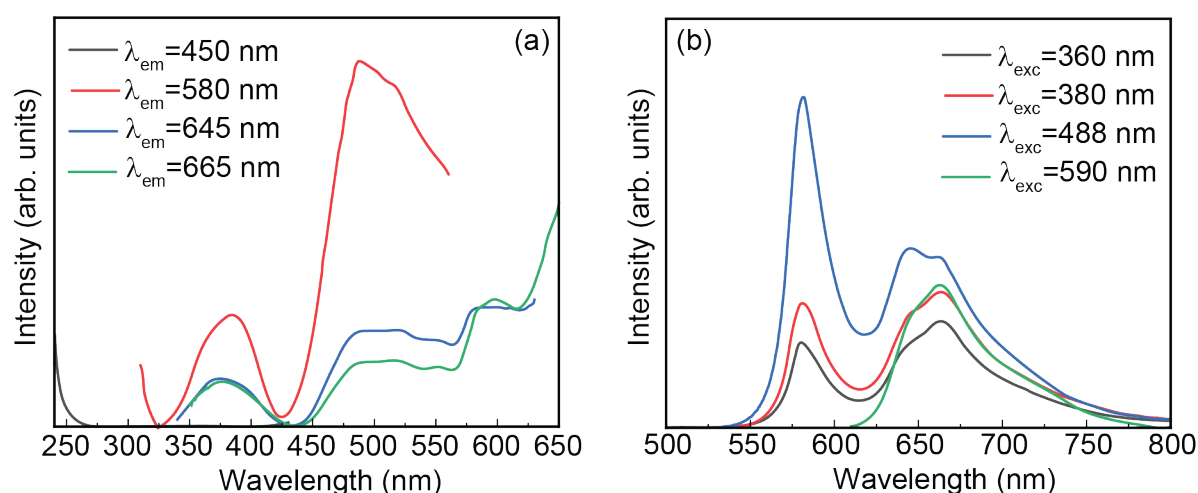**Figure S2.** Room-temperature (a) excitation and (b) emission spectra of R-PE in H<sub>2</sub>O.

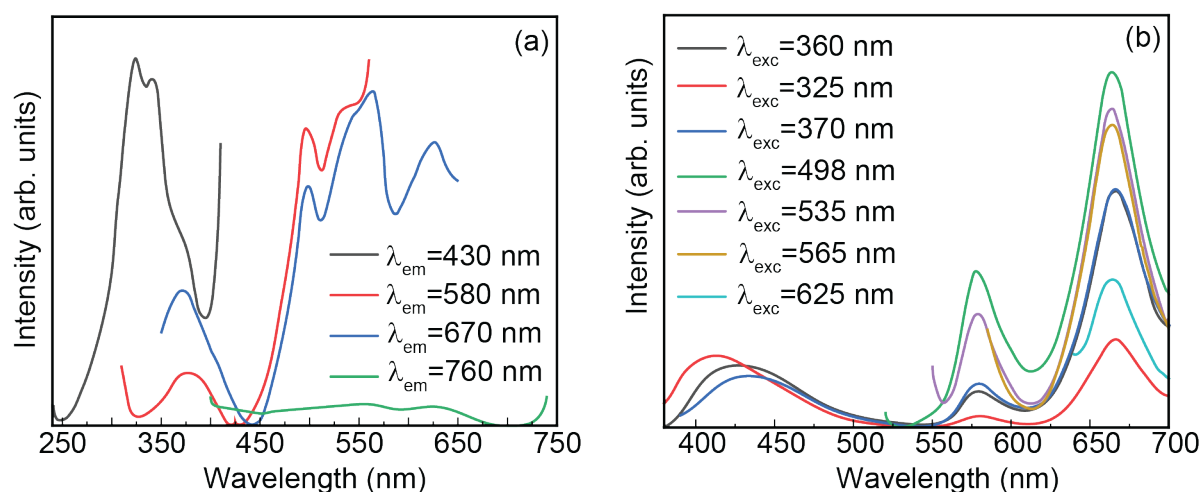

**Figure S3.** Room-temperature (a) excitation and (b) emission spectra of R-PE/PVA sample.

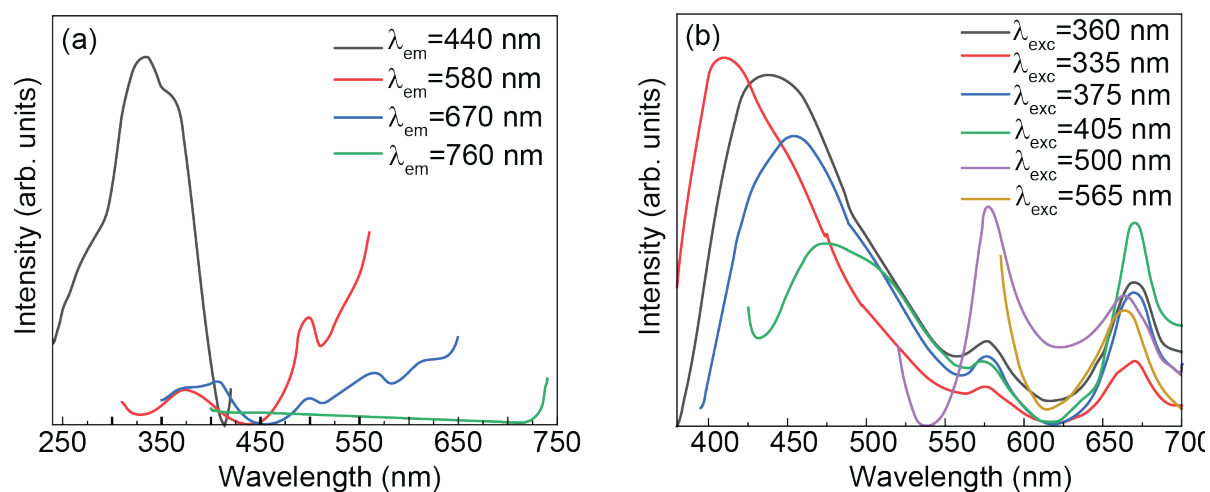

**Figure S4.** Room-temperature (a) excitation and (b) emission spectra of R-PE/alginate.

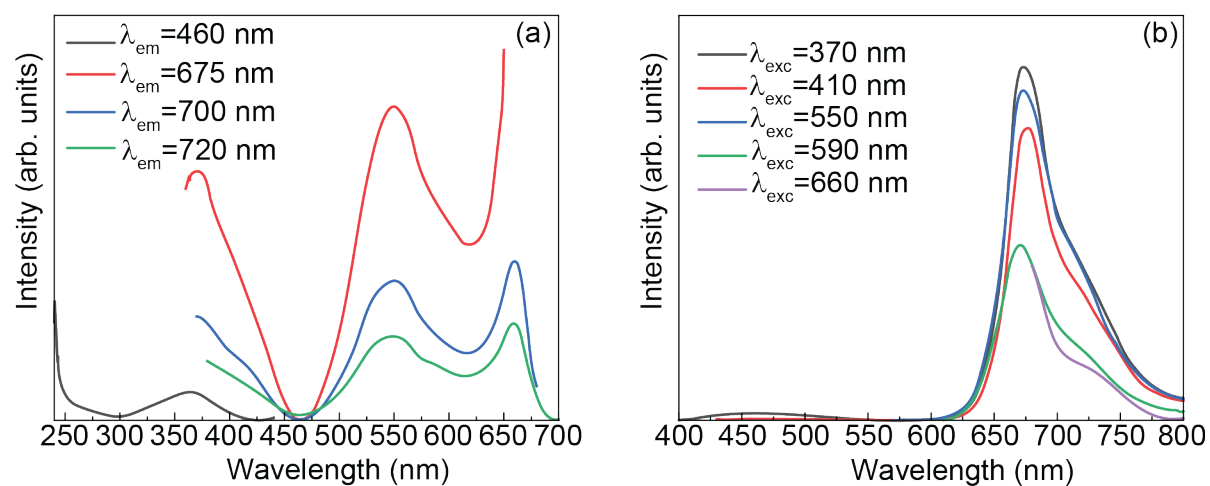

**Figure S5.** Room-temperature (a) excitation and (b) emission spectra of C-PC in H<sub>2</sub>O.

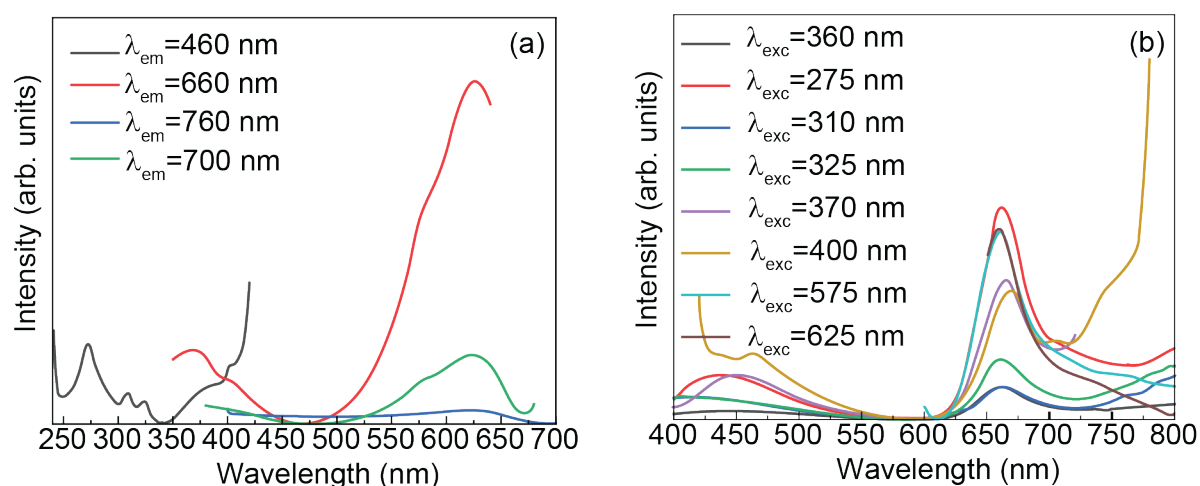

**Figure S6.** Room-temperature (a) excitation and (b) emission spectra of C-PC/PVA sample.

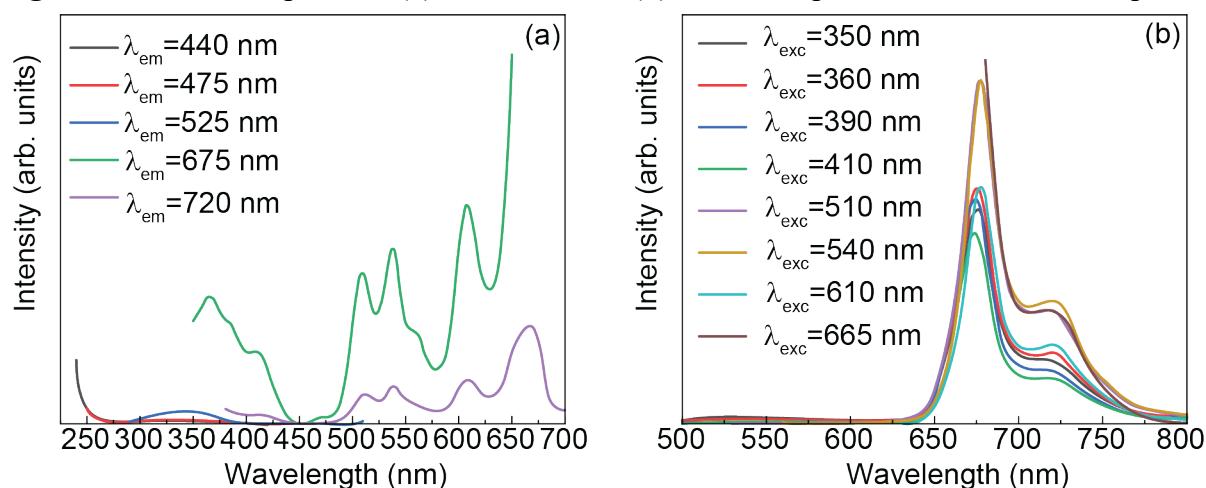

**Figure S7.** Room-temperature (a) excitation and (b) emission spectra of FX in ethanol.

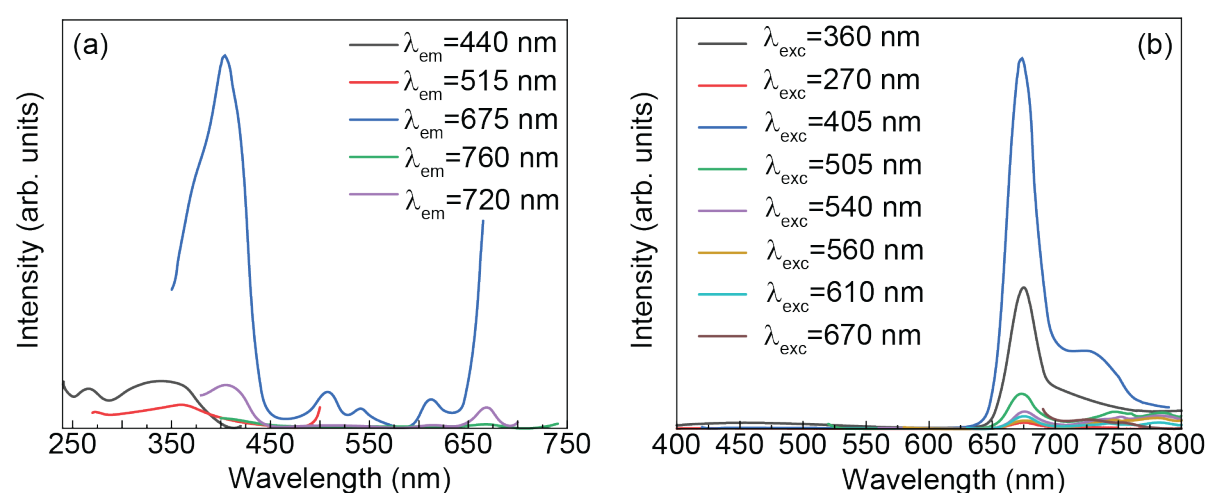

**Figure S8.** Room-temperature (a) excitation and (b) emission spectra of FX/PVA.

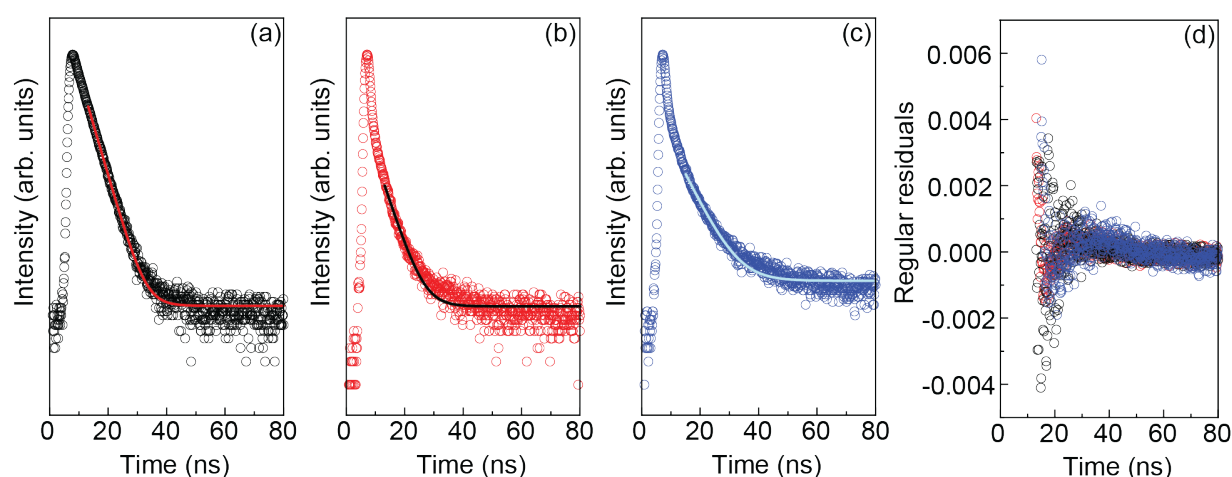

**Figure S9.** Room-temperature emission decay curve of (a) R-PE in H<sub>2</sub>O, (b) R-PE/PVA and (c) R-PE/alginate excited at 388 nm and monitored at 580 nm. The solid lines represent the data best fit ( $R^2 > 0.99$ ), using a single-exponential function  $I(t) = I_1 e^{-(t-t_0)/\tau_1}$  ( $t_0 = 13$  ns, related to the excitation prompt). The respective residual plot is presented in (d).

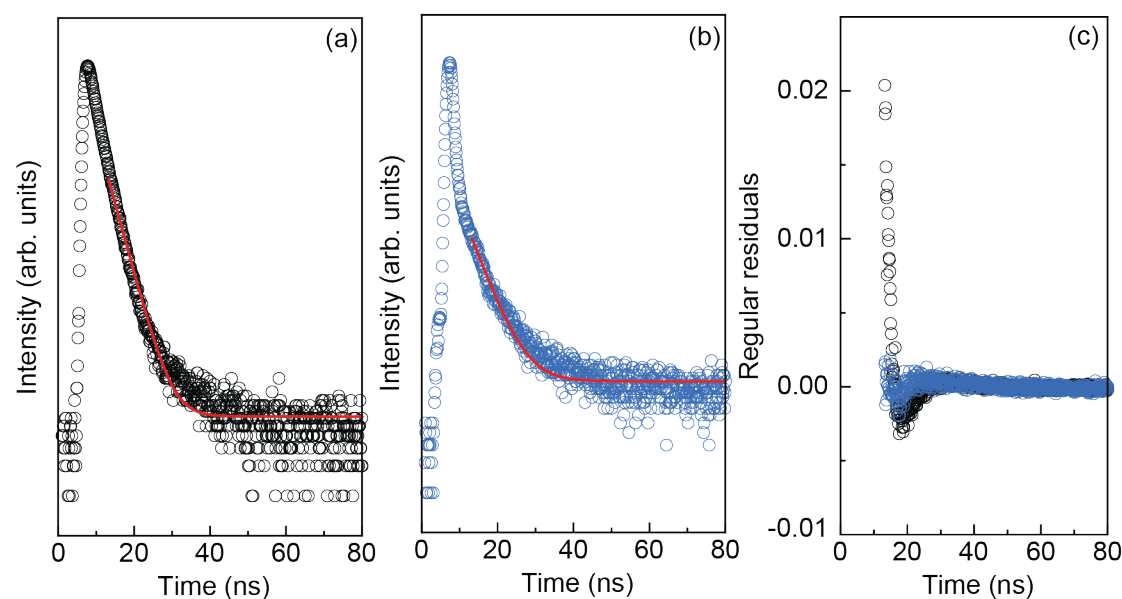

**Figure S10.** Room-temperature emission decay curve of (a) C-PC in H<sub>2</sub>O and (b) C-PC/PVA excited at 388 nm and monitored at 670 nm. The solid lines represent the data best fit ( $R^2 > 0.97$ ), using a single-exponential function  $I(t) = I_1 e^{-(t-t_0)/\tau_1}$  ( $t_0 = 13$  ns, related to the excitation prompt). The respective residual plots are presented in (c).

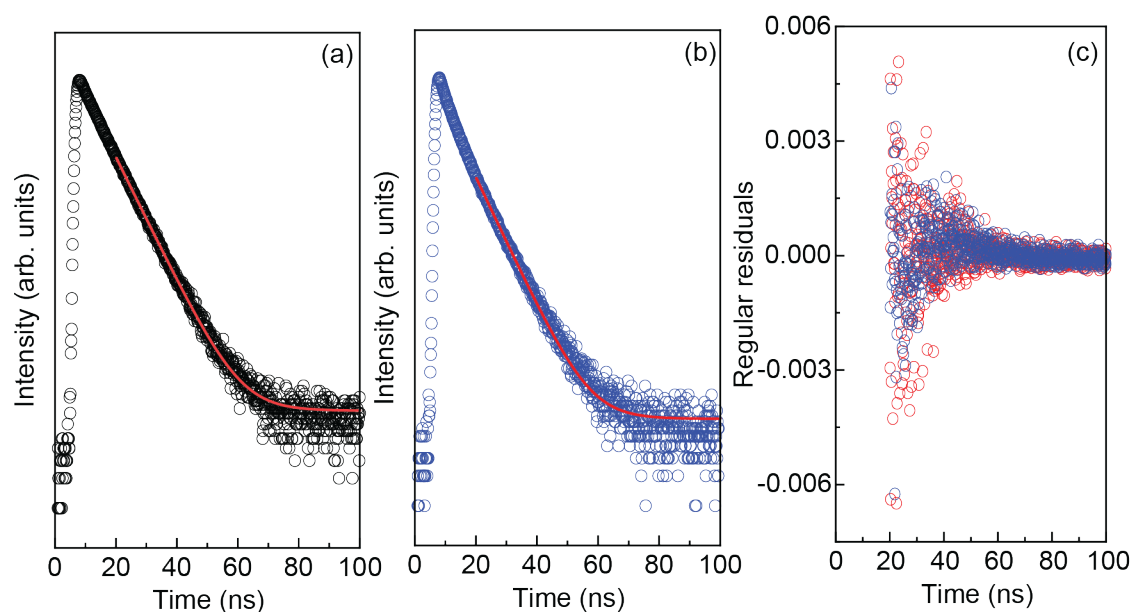

**Figure S11.** Room-temperature emission decay curve of (a) FX in ethanol and (b) FX/PVA excited at 388 nm and monitored at 675 nm. The solid lines represent the data best fit ( $R^2 > 0.99$ ), using a single-exponential function  $I(t) = I_1 e^{-(t-t_0)/\tau_1}$  ( $t_0 = 20$  ns, related to the excitation prompt). The respective residual plot is presented in (c).
